# Supplementary material for: The effect of sulfate pre-treatment to improve the deposition of Au-nanoparticles in a gold-modified sulfated g-C3N4plasmonic photocatalyst towards visible light induced water reduction reaction
Source: Royal Society of Chemistry journal article supplement (doi:10.1039/c6cp04262g), 2016-01-01
Supplement: c6cp04262g1.pdf [file c6cp04262g1.pdf]

## Supplementary Information

### Effect of Sulfate Pre-treatment to improve deposition of Au-nanoparticles in Gold-Modified sulphated g-C<sub>3</sub>N<sub>4</sub> plasmonic photocatalyst towards visible light induced water reduction reaction

Sulagna patnaik<sup>1</sup>, Satyabadi Martha<sup>1</sup>, Giridhar Madras<sup>2</sup> and Kulamani Parida<sup>1\*</sup>

#### FTIR

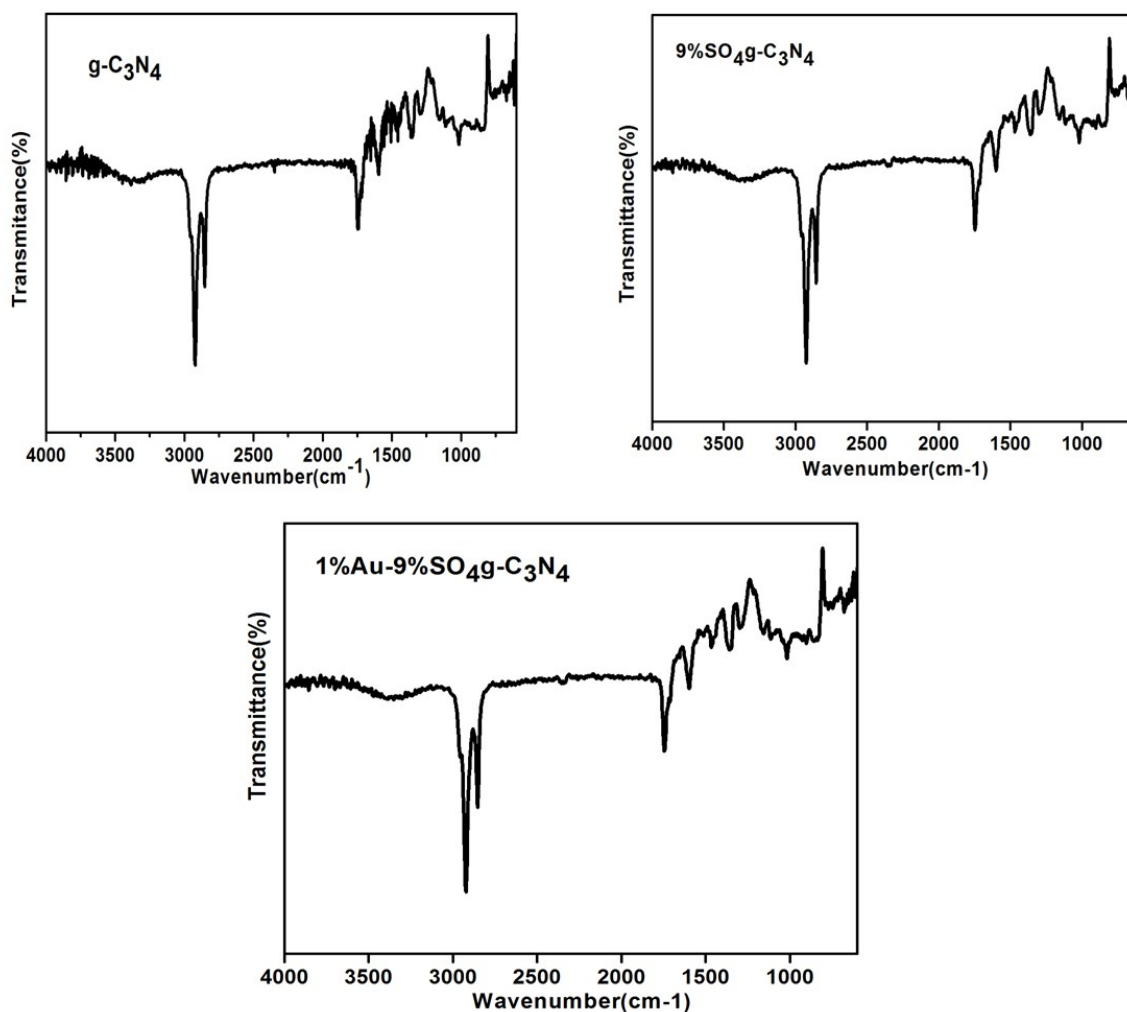

Fig. S1 FTIR spectra of g-C<sub>3</sub>N<sub>4</sub>, 9%SO<sub>4</sub>g-C<sub>3</sub>N<sub>4</sub> and 1%Au-9%SO<sub>4</sub>g-C<sub>3</sub>N<sub>4</sub>
